# Supplementary material for: Fluorescence chemosensors based on functionalized SBA-15 for detection of Pb2+ in aqueous media
Source: Royal Society of Chemistry journal article supplement (doi:10.1039/c5ra00696a), 2015-01-01
Supplement: c5ra00696a1.pdf [file c5ra00696a1.pdf]

# Fluorescence Chemosensors Based on Functionalized SBA-15 for Detection of Pb<sup>2+</sup> in Aqueous Media

*Liyan Zhao<sup>†</sup>, Dan Sui<sup>‡</sup> and Yan Wang<sup>\*†</sup>*

<sup>†</sup> Academy of Fundamental and Interdisciplinary Science, Harbin Institute of Technology, Harbin 150001, China.

<sup>‡</sup> Management Office of Laboratory and Equipment (Center of Analysis and Testing), Northeast Forestry University, Harbin 150040.

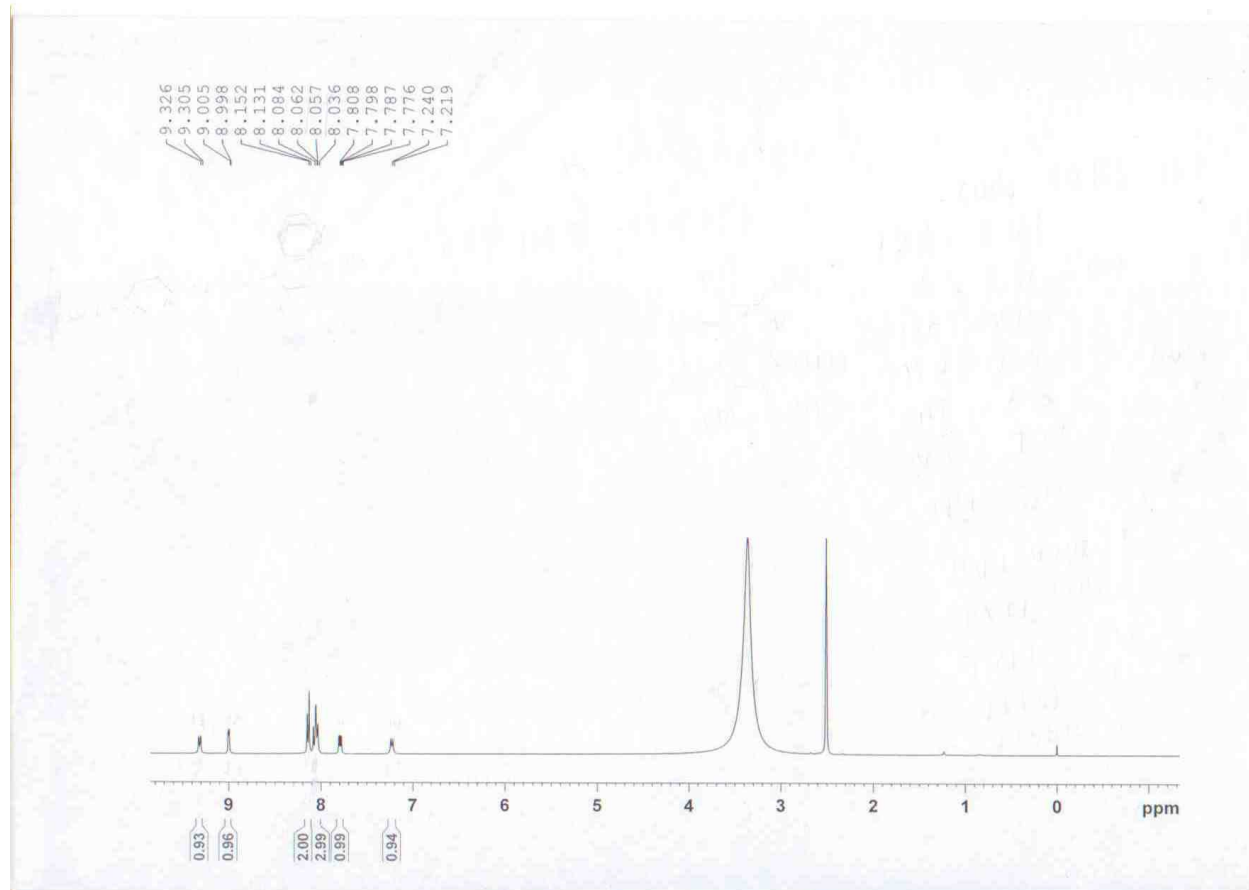

Figure S1. <sup>1</sup>H NMR (500 MHz, DMSO-*d*<sub>6</sub>) spectrum of compound CPA-8-HQL.

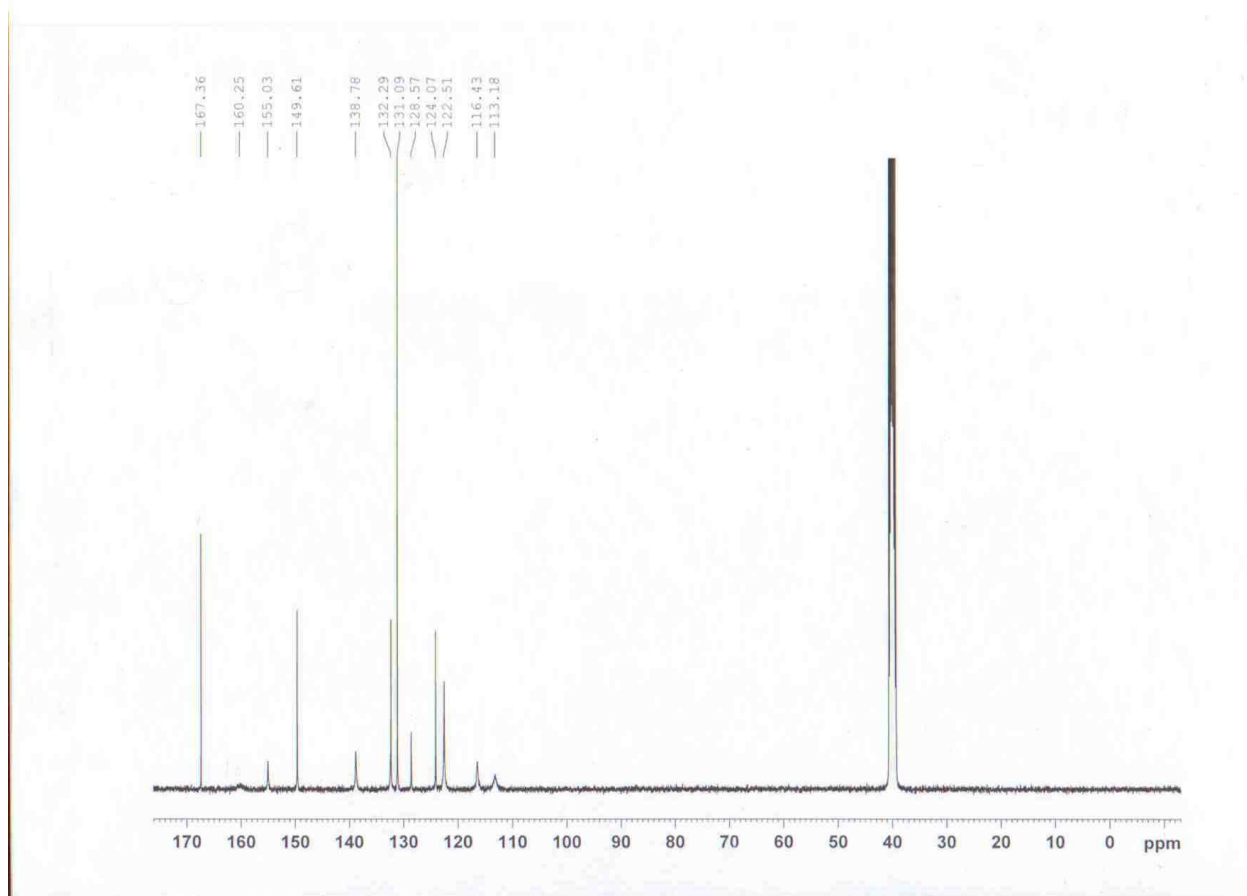

Figure S2.  $^{13}\text{C}$  NMR (100 MHz,  $\text{DMSO-}d_6$ ) spectrum of compound CPA-8-HQL.

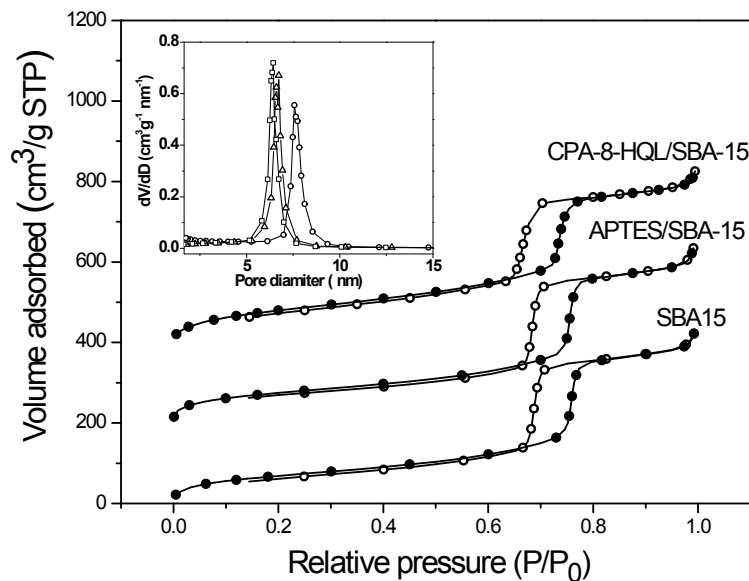

Figure S3. N<sub>2</sub> adsorption-desorption isotherms of SBA-15, APTES/SBA-15, and CPA-8-HQL/SBA-15. Inset: the BJH pore size distribution of SBA-15 (○), APTES/SBA-15 (△), and CPA-8-HQL/SBA-15 (□).

**Table S1. Structural parameters of SBA-15, APTES/SBA-15, and CPA-8-HQL/SBA-15.**

| Sample           | $S_{\text{BET}}^{\text{a}}$ ( $\text{m}^2 \text{g}^{-1}$ ) | $d_{\text{p}}^{\text{b}}$ (nm) | $V_{\text{p}}^{\text{c}}$ ( $\text{cm}^3 \text{g}^{-1}$ ) |
|------------------|------------------------------------------------------------|--------------------------------|-----------------------------------------------------------|
| SBA-15           | 439                                                        | 7.4                            | 0.66                                                      |
| APTES/SBA-15     | 378                                                        | 6.5                            | 0.47                                                      |
| CPA-8-HQL/SBA-15 | 258                                                        | 6.2                            | 0.45                                                      |

<sup>a</sup>BET specific surface area obtained from adsorption isotherm data within the P/P<sub>0</sub> range of 0.05–0.35. <sup>b</sup>BJH pore diameter obtained from desorption isotherm. <sup>c</sup>Pore volume obtained from BJH analysis on desorption isotherm.

## Detection Limit

The detection limit was determined from the fluorescence titration data based on a reported and broadly used method: [1,2] According to the result of titrating experiment, the fluorescent intensity data at 429 nm were normalized between the minimum intensity (0 equiv.  $\text{Pb}^{2+}$ ) and the maximum intensity (16 equiv. of  $\text{Pb}^{2+}$ ). A linear regression curve was then fitted to these normalized fluorescent intensity data and the concentration of  $\text{Pb}^{2+}$ . The point at which this line crossed the ordinate axis was considered as the detection limit. It was found that CPA-8-HQL/SBA-15 had a detection limit of  $4.90 \times 10^{-7}$  M for  $\text{Pb}^{2+}$ .

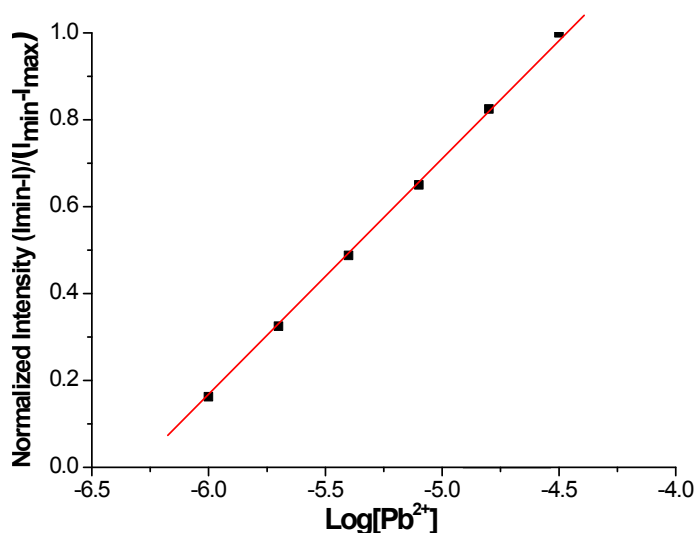

Figure S4. Emission (at 429 nm) of CPA-8-HQL/SBA-15 at different concentrations of  $\text{Pb}^{2+}$  (0.5, 1, 2, 4, 8 and 16 eq) added, normalized between the minimum emission (0 equiv. of  $\text{Pb}^{2+}$ ) and the maximum emission intensity (16 equiv. of  $\text{Pb}^{2+}$ ). The detection limit was determined to be  $4.90 \times 10^{-7}$  M.

## References:

- [1] M. Shortreed, R. Kopelman, M. Kuhn, B. Hoyland, *Anal. Chem.* 68 (1996) 1414-1418.
- [2] A. Caballero, R. Martínez, V. Lloveras, I. Ratera, J. Vidal-Gancedo, K. Wurst, A. Tàrraga, P. Molina, J. Veciana, *J. Am. Chem. Soc.* 127 (2005) 15666-15667.
